# Supplementary material
Source: bioRxiv or medRxiv preprint supplement (https://www.biorxiv.org/highwire/filestream/125280/field_highwire_adjunct_files/0/413070-1.pdf)
Supplement: Supplementary file [file 413070-1.pdf]

A

### Melt Curve Plot

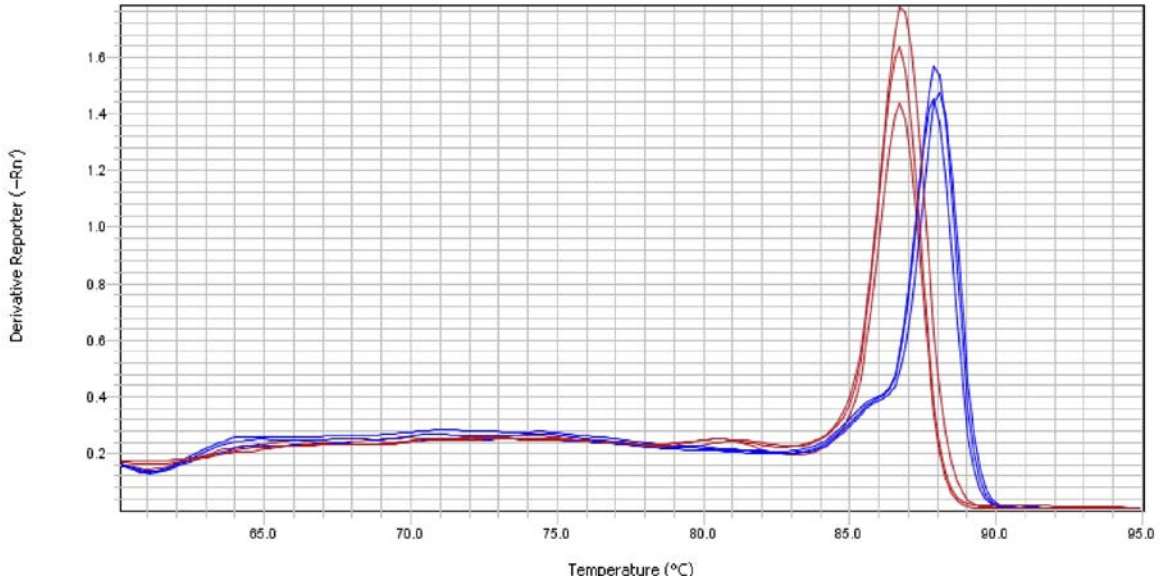

B

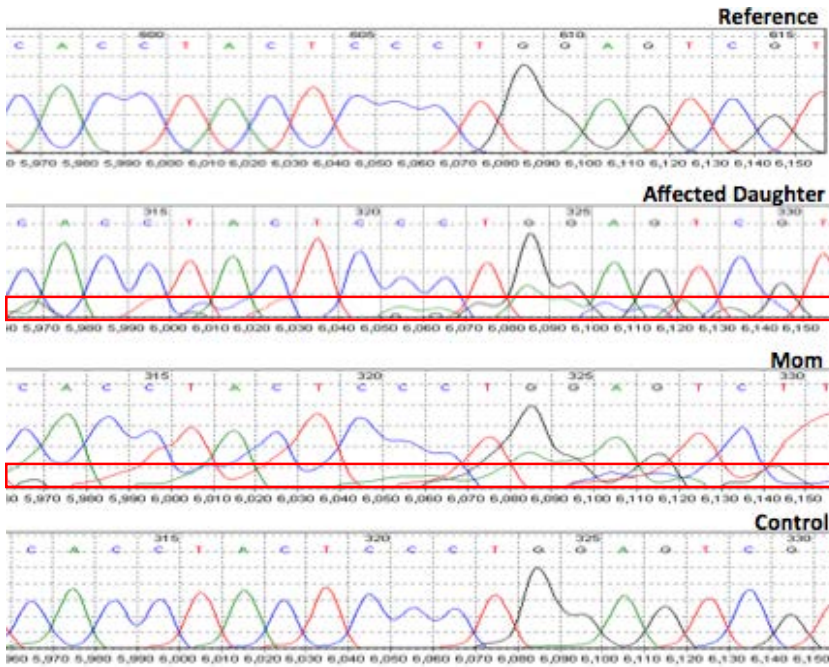

Supplemental Figure S1
